# Supplementary material
Source: HighWire-hosted journal article supplement (https://tobaccocontrol.bmj.com/content/tc-2024-058798)
Supplement: inline-supplementary-material-2 [file inline-supplementary-material-2.pdf]

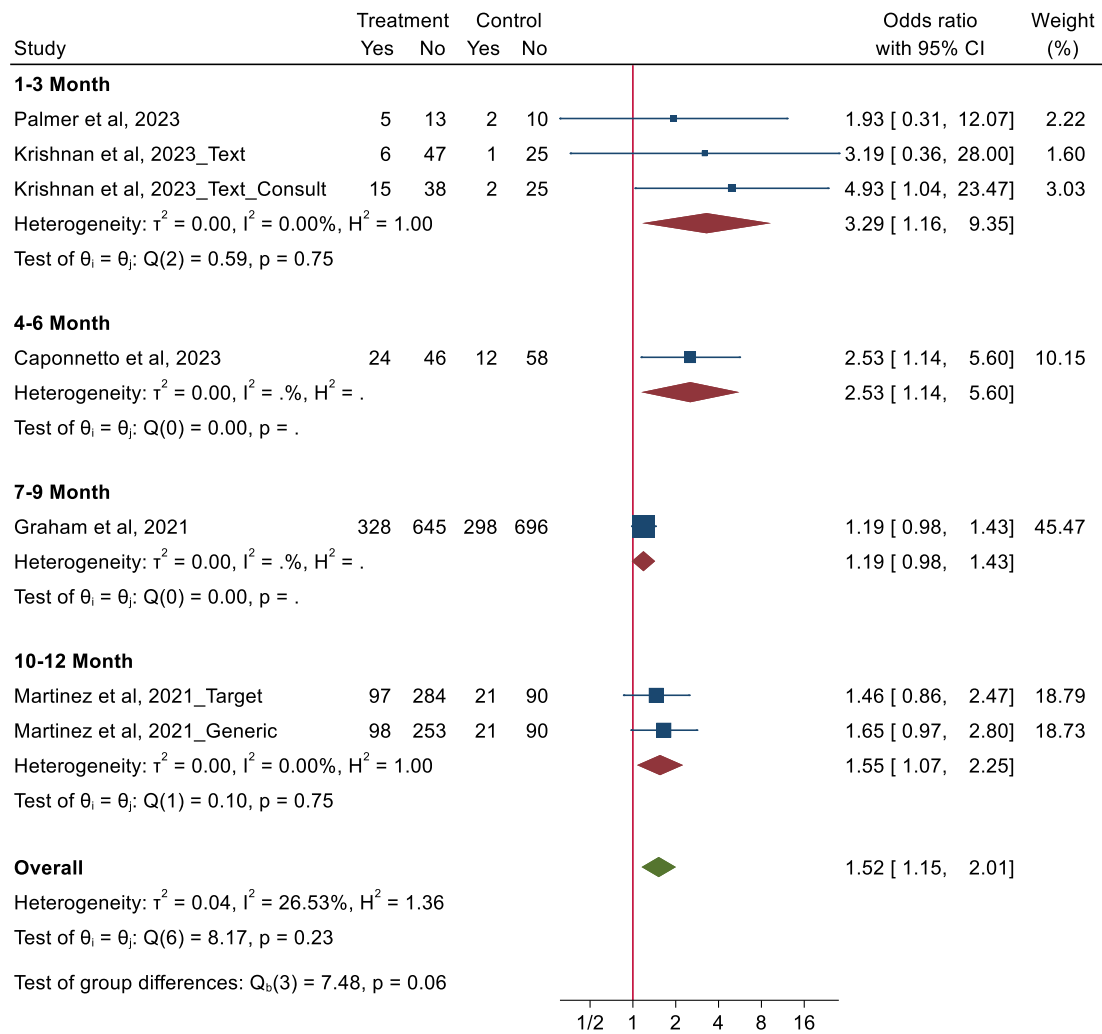

Random-effects DerSimonian–Laird model

A

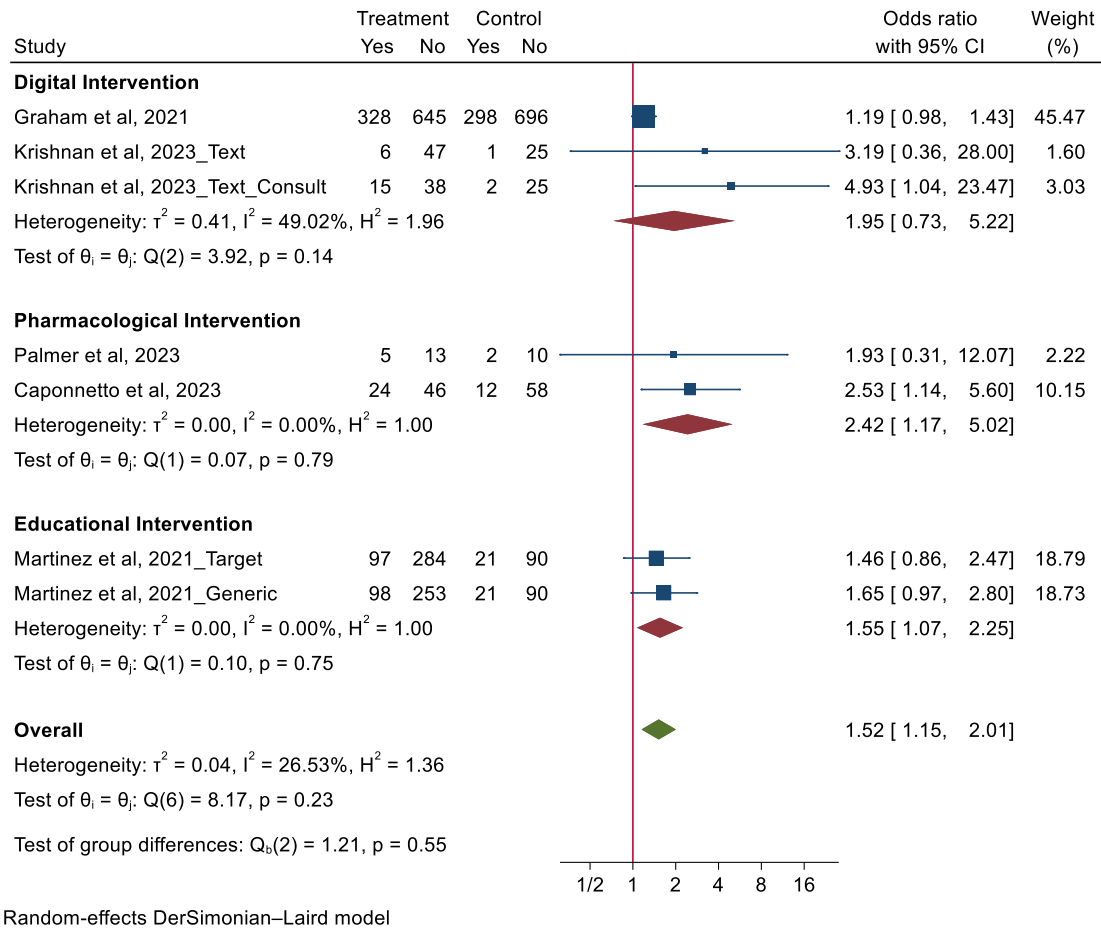

B

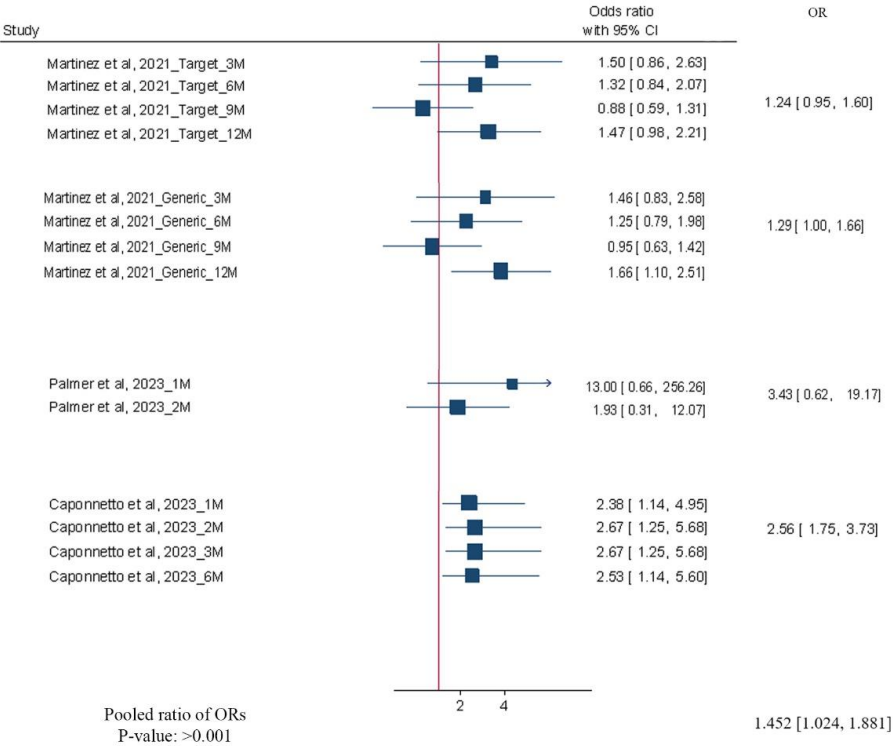

C

**Supplementary file 2:** sub grouped analysis of Vaping Cessation Interventions on 7-day Point Prevalence of Abstinence based on duration (A) type of interventions (B) and subgroup of -day Point Prevalence of Abstinence measurements within studies (C).
